# Supplementary material for: Long noncoding RNA repressor of adipogenesis negatively regulates the adipogenic differentiation of mesenchymal stem cells through the hnRNP A1‐PTX3‐ERK axis
Source: PubMed Central journal article supplement (PMC7648959; doi:10.1002/ctm2.227), 2020-11-08
Supplement: CTM2-10-e227-s001.pdf [file CTM2-10-e227-s001.pdf]

# Supplementary Figures S1 to S4

**A**

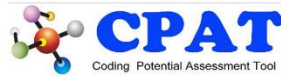

[Calculator](#) [User Guide](#) [Feedback](#) [Source Code](#)

Result for species name : hg19 with job ID :1584693166

| Data ID | Sequence Name  | RNA Size | ORF Size | Fickett Score | Hexamer Score    | Coding Probability | Coding Label |
|---------|----------------|----------|----------|---------------|------------------|--------------------|--------------|
| 0       | TCONS_00020478 | 2030     | 249      | 0.7665        | 0.00799296881268 | 0.044490685285902  | no           |

This job has been stored with the job ID  
[Download Table in tab delimited file \(.txt\)](#)

For suggestions, comments or queries about this website,  
 please leave your feedback through [Feedback](#).  
 Copyright © 2012. All rights reserved.

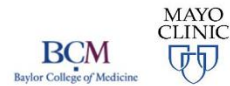

**B**

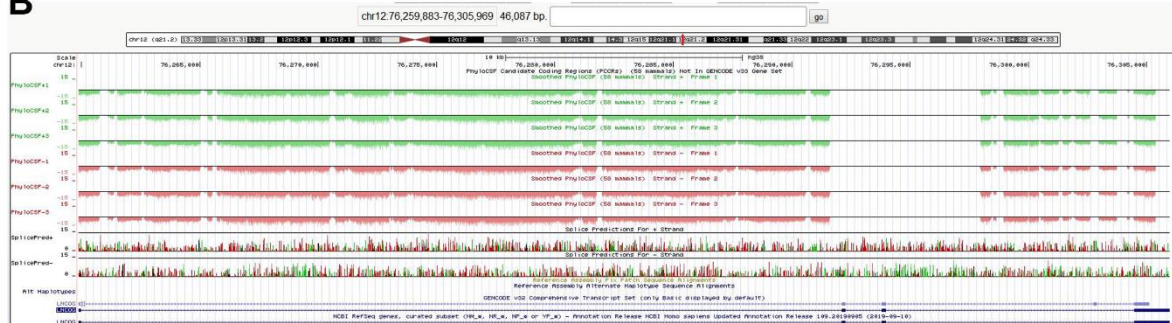

**C**

CPC 2.0 [Home](#) [Batch](#) [Download](#) [Help](#) [About](#)

## Summary

Sequence TCONS\_00020478 got Fickett score 0.30166 with a complete putative ORF 83 AA, a pI 6.00152587891, which, in total, classify it as a noncoding sequence with coding probability 0.0891574.

## Details

PUTATIVE PEPTIDE  
 >TCONS\_00020478  
 MKTTCVTFGAEDPGQRDSFGGPPVHCPCPHSVRRPTYDLGSSDQPAQGTSHQFQIGTPLENGLNSPQSHSQSPWNSGPRLSQ

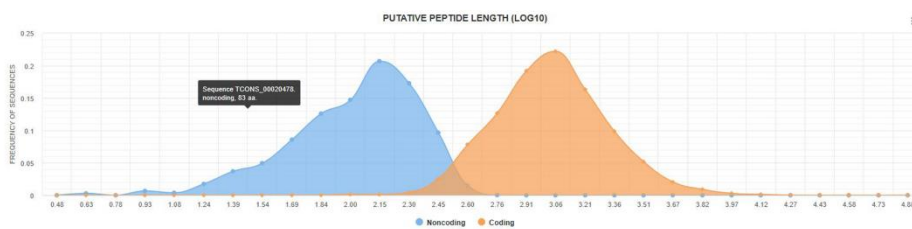

**D**

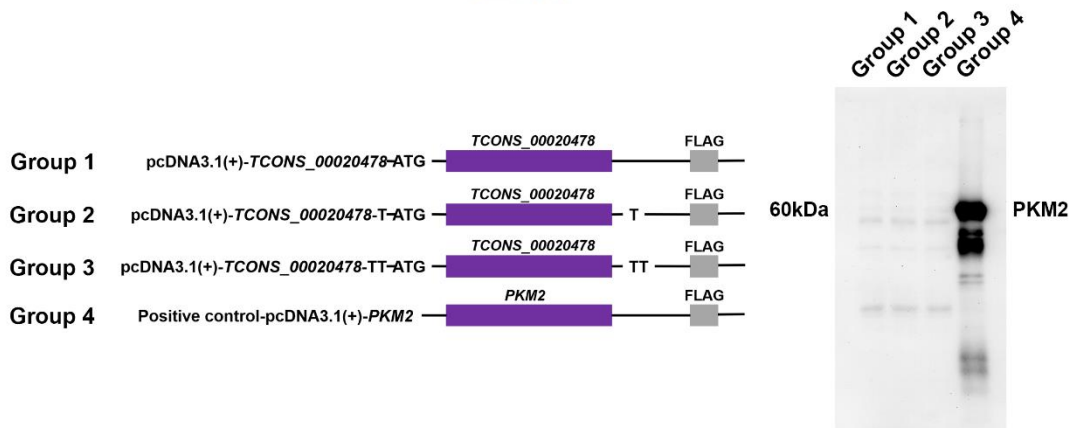

## **FIGURE S1**

A to C, Prediction of the coding ability of *TCONS\_00020478* using the online tools Coding Potential Assessment Tool, PhyloCSF, and Coding Potential calculator all showed little protein-coding possibility of *ROA*.

D, An in vitro expression assay confirmed that *TCONS\_00020478* had no protein-coding ability.

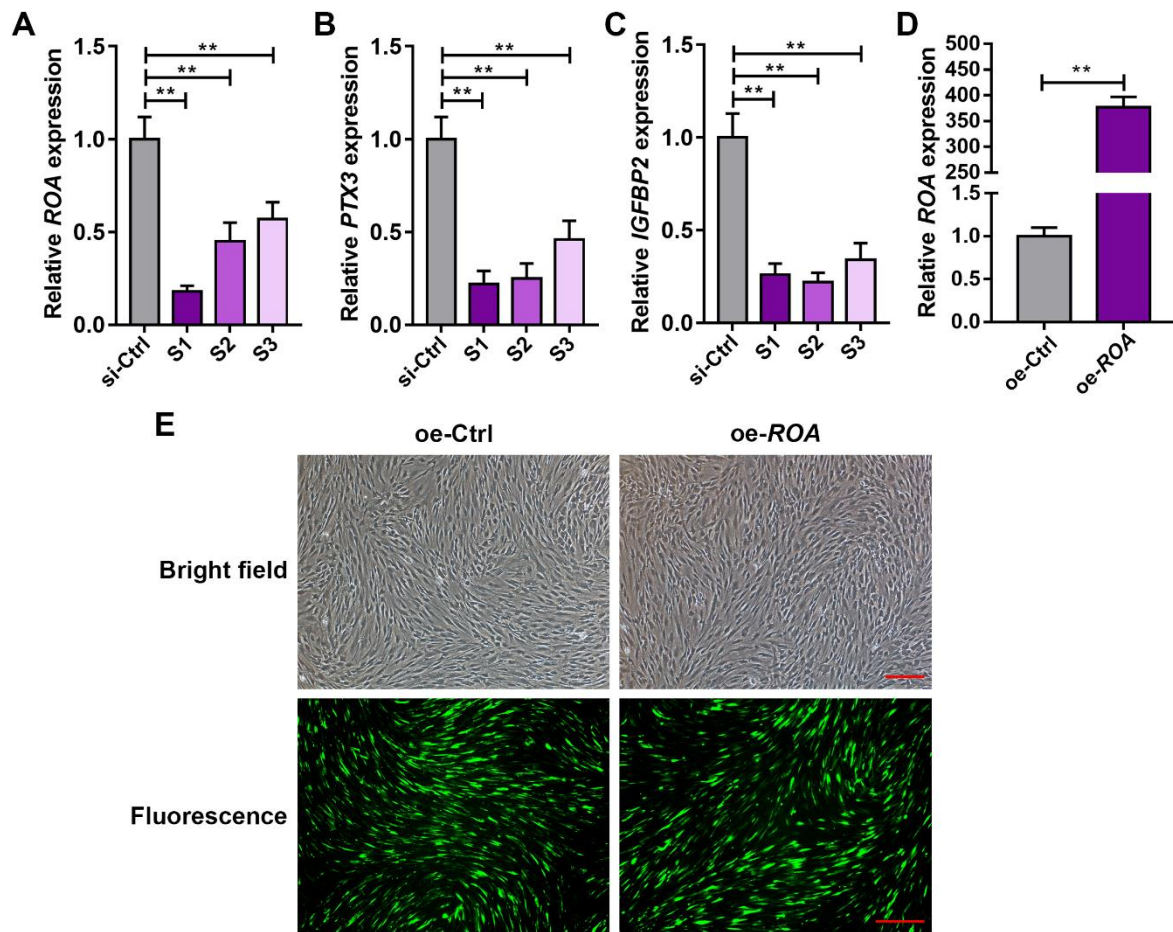

**FIGURE S2**

A to C, Knockdown efficiency of siRNA sequences designed for *ROA*, *PTX3* and *IGFBP2* detected by qRT-PCR on day 3 after transfection. The ones with the best interfering efficiency were chosen for the following experiments.

D, Overexpression efficiency of *ROA* detected by qRT-PCR on day 3 after Lentivirus transfection.

E, Bright field and fluorescent images showing *ROA* was evenly overexpressed among cells and did not have an apparent influence on cell viability or morphology. Scale bar = 150  $\mu$ m.

The results are presented as the mean  $\pm$  SD (n = 18, three independent experiments, each with six different samples). \*\*, p<0.01, as determined by ANOVA.

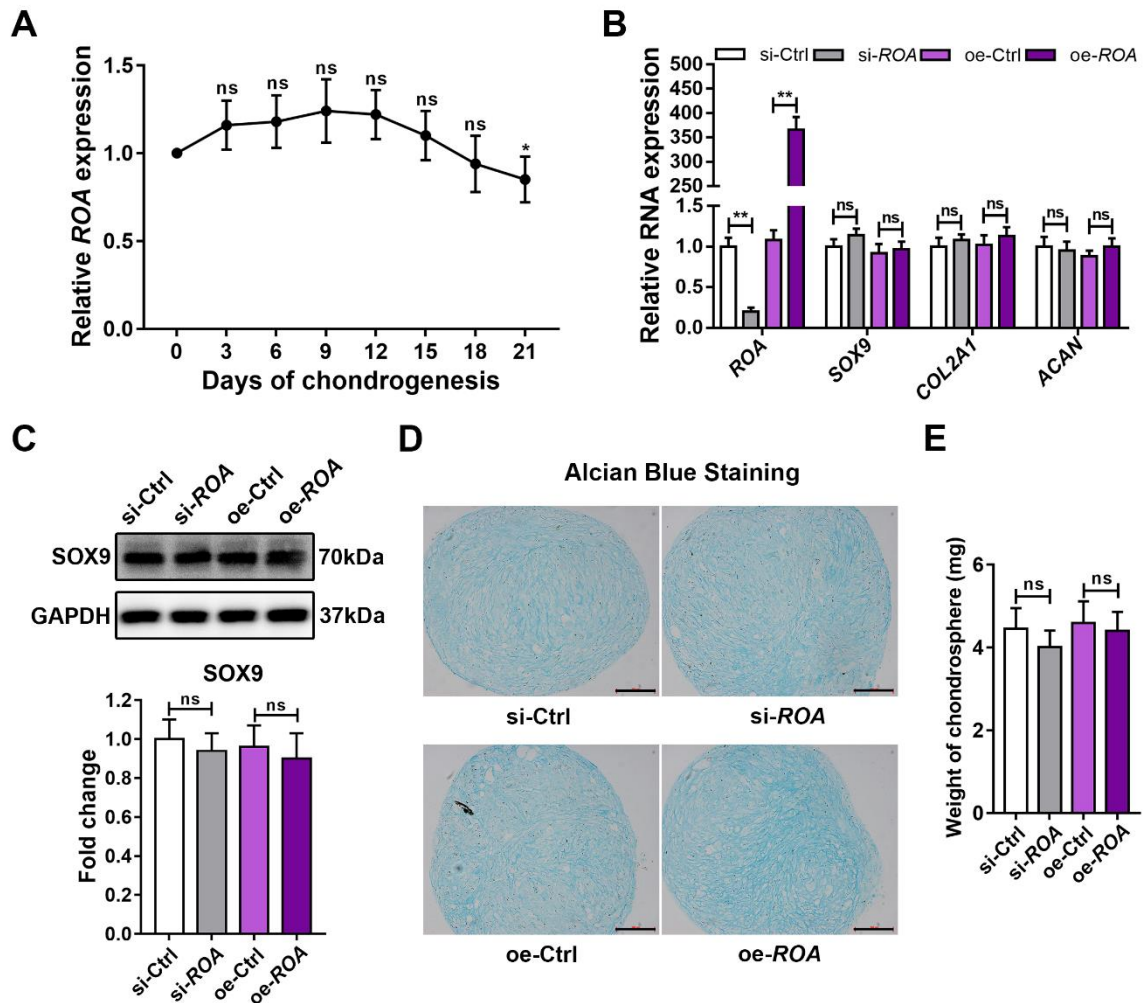

**FIGURE S3**

A, Dynamic *ROA* expression during MSC chondrogenesis detected by qRT-PCR. \*,  $p < 0.05$ , ns, not significant, compared to day 0.

B, Relative expression of chondrogenesis-related genes detected by qRT-PCR on day 3 of MSC adipogenesis after *ROA* knockdown/overexpression.

C, Western blot of SOX9 on day 7. Data were normalized to GAPDH.

D, Alcian blue staining on day 21. Scale bar = 150  $\mu$ m.

E, Quantification of chondrosphere weight on day 21.

The results are presented as the mean  $\pm$  SD ( $n = 18$ , three independent experiments, each with six different samples). \*\*,  $p < 0.01$ ; ns, not significant, as determined by ANOVA.

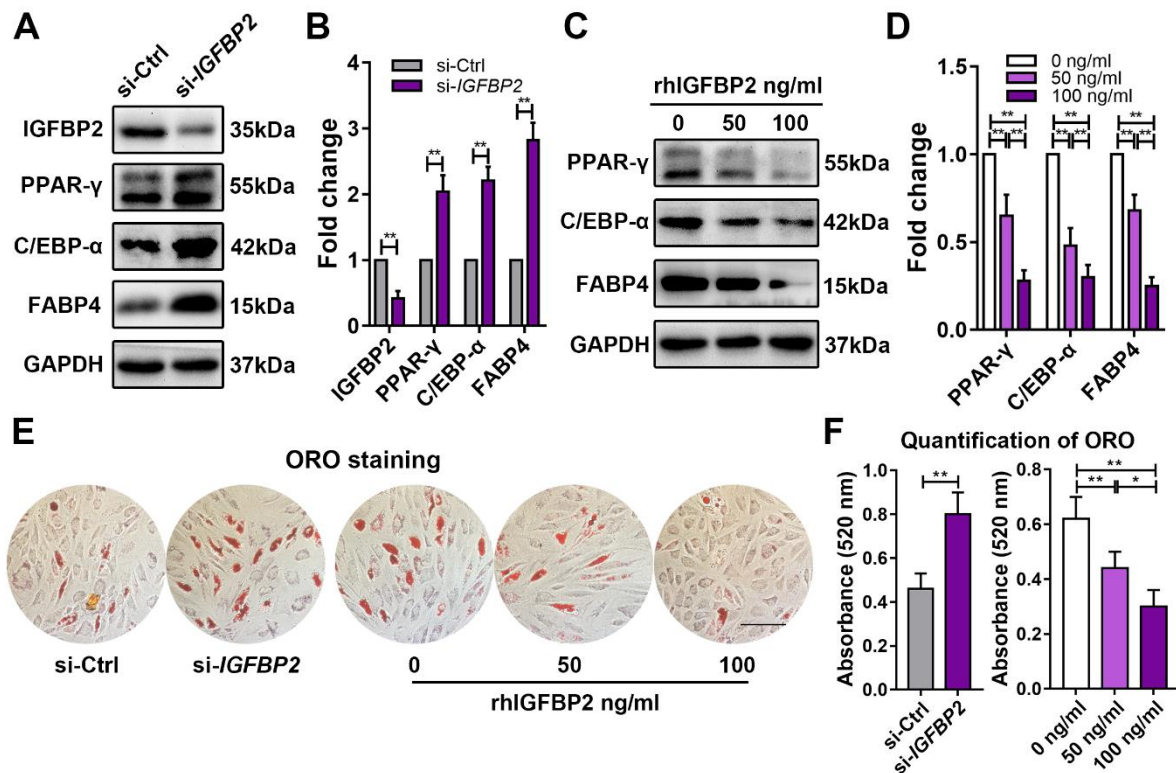

**FIGURE S4**

A and B, Western blot of IGFBP2 and adipogenic markers on day 5 of MSC adipogenesis after *IGFBP2* knockdown. Data were normalized to GAPDH.

C and D, Western blot of adipogenic markers on day 5 of MSC adipogenesis after recombinant human IGFBP2 (rhIGFBP2) stimulation. Data were normalized to GAPDH.

E and F, MSC adipogenesis evaluated by ORO staining and quantification on day 12 after *IGFBP2* knockdown or rhIGFBP2 stimulation. Scale bar = 150  $\mu$ m.

The results are presented as the mean  $\pm$  SD (n = 18, three independent experiments with six different samples). \*, p<0.05; \*\*, p<0.01, as determined by Student's t test or ANOVA.

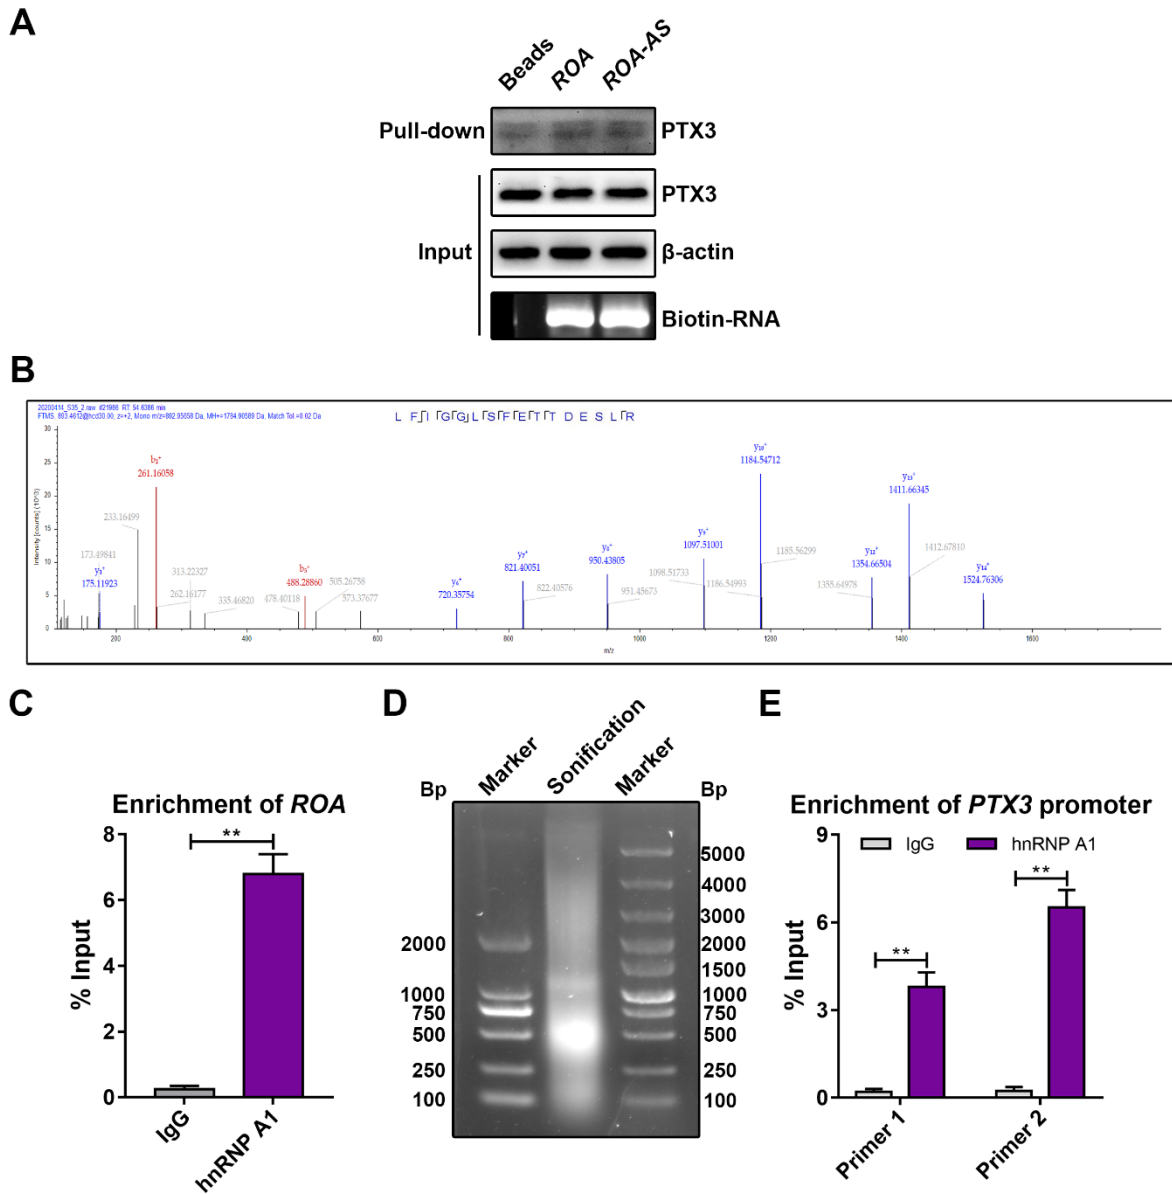

**FIGURE S5**

A, Western blotting showing PTX3 was not enriched by pull-down with biotinylated *ROA* compared to *ROA-AS* or empty magnetic beads control.

B, The peptide sequence of hnRNP A1 was detected in the pull-down proteins by mass spectrometry. Red peaks indicate secondary fragments close to the N-terminal and blue to the C-terminal.

C, Quantification of the RIP assay.

D, Agarose gel electrophoresis of ChIP sonification product. Most fragments were of 200~1000 bp in length.

E, Quantification of the ChIP assay.
